# Supplementary material for: High Temperature-Resistant Transparent Conductive Films for Photoelectrochemical Devices Based on W/Ag Composite Nanonetworks
Source: MDPI journal article supplement (doi:10.3390/nano13040708), 2023-02-12
Supplement: s1 [file s1]

# High Temperature Resistant Transparent Conductive Films for Photoelectrochemical Devices Based on W/Ag Composite Nanonetworks

Menghan Liu <sup>1</sup>, Peiling Ren <sup>1</sup>, Hu Qiao <sup>2</sup>, Miaomiao Zhang <sup>1</sup>, Wenxuan Wu <sup>1</sup>, Baoping Li <sup>1</sup>, Hongjun Wang <sup>1</sup>, Daobin Luo <sup>1</sup>, Jianke Liu <sup>1</sup>, Youqing Wang <sup>1,\*</sup>

<sup>1</sup> Research Center for Semiconductor Materials and Devices, Shaanxi University of Science and Technology, Xi'an 710021, China

<sup>2</sup> School of Mechatronic Engineering, Xi'an Technological University, Xi'an 710021, China

\* Corresponding author. E-mail address: wangyouqing@sust.edu.cn

## Supplementary Data

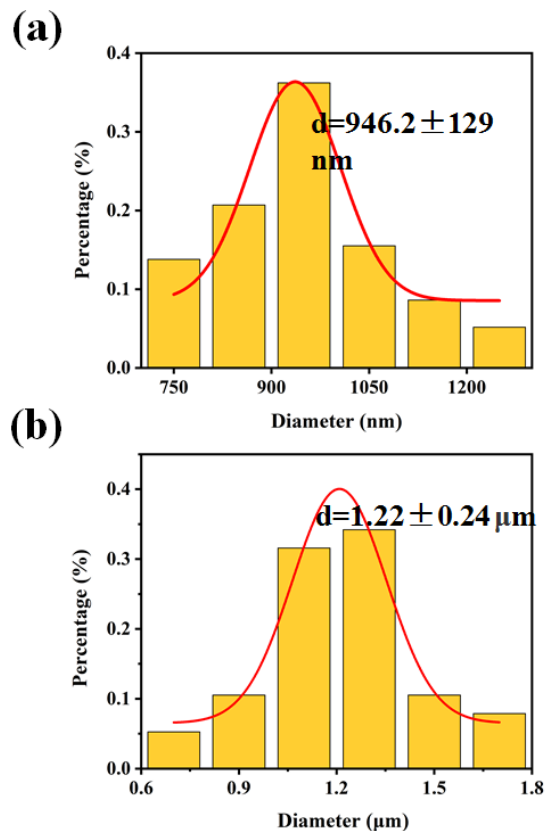

**Figure S1.** Diameter statistics of (a) Ag nanowires and (b) W/Ag composite

nanowires.

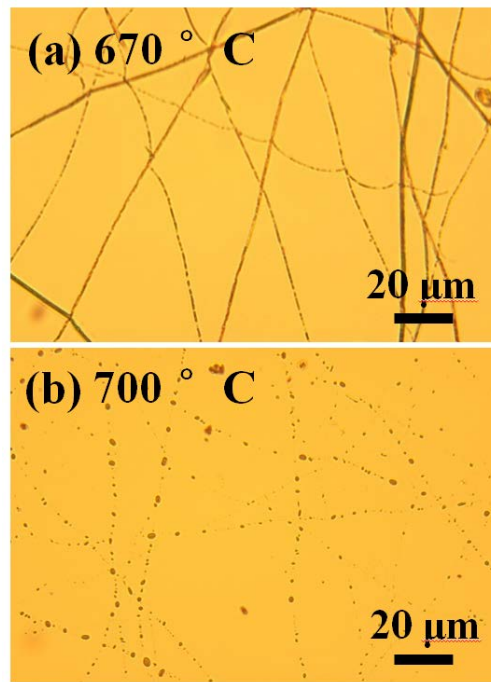

**Figure S2.** The melting state of W nanowires at different temperatures.
